# Supplementary material
Source: MDPI journal article supplement (https://www.mdpi.com/2673-4583/5/1/84)
Supplement: s1 [file s1]

# QSPR Modelling of Potentiometric $\text{HCO}_3^-/\text{Cl}^-$ Selectivity for Polymeric Membrane Sensors <sup>†</sup>

Nadezhda Vladimirova \*, Julia Ashina and Dmitry Kirsanov

Institute of Chemistry, Saint Petersburg State University, 198504 Saint Petersburg, Russia; y.ashina@spbu.ru (J.A.); d.kirsanov@gmail.com (D.K.)

\* Correspondence: hada96@mail.ru

<sup>†</sup> Presented at the 1st International Electronic Conference on Chemical Sensors and Analytical Chemistry, 1–15 July 2021; Available online: <https://csac2021.sciforum.net/>.

**Table S1.** Structure and selectivity of ionophores of potentiometric sensors.

| # | Structure of ionophore                                                              | Plasticiser | Log $K(\text{HCO}_3^-/\text{Cl}^-)$ | Reference |
|---|-------------------------------------------------------------------------------------|-------------|-------------------------------------|-----------|
| 1 | 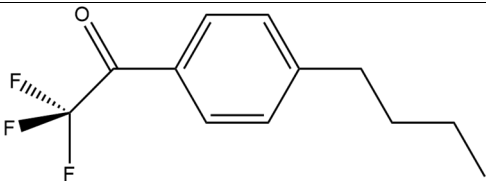   | DOS         | −2                                  | [1]       |
| 2 |   | DOS         | 1.3                                 | [2]       |
| 3 |  | DOS         | −1.8                                | [2]       |
| 4 |  | DOS         | −3.2                                | [2]       |
| 5 |  | DOS         | −3.8                                | [2]       |
| 6 |  | DOS         | −4                                  | [2]       |

|    |                                                                                     |     |      |     |
|----|-------------------------------------------------------------------------------------|-----|------|-----|
| 7  | 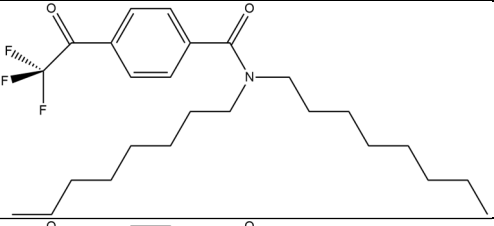   | DOS | -5   | [2] |
| 8  |    | DOS | -4   | [3] |
| 9  |    | DOS | -5   | [2] |
| 10 |   | DOS | -5   | [2] |
| 11 |  | DOS | -2.1 | [1] |
| 12 |  | DOA | -3.7 | [4] |
| 13 |  | DOS | -3   | [1] |
| 14 |  | DOS | -2.8 | [5] |
| 15 |  | DOS | -3   | [5] |

|    |                                                                                     |      |      |     |
|----|-------------------------------------------------------------------------------------|------|------|-----|
| 16 | 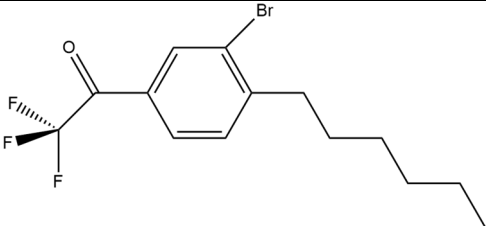   | DOS  | -3.2 | [5] |
| 17 |    | DOS  | -3.2 | [5] |
| 18 |    | NPOE | -2.4 | [5] |
| 19 |   | NPOE | -2.4 | [5] |
| 20 |  | NPOE | -2.8 | [5] |
| 21 |  | NPOE | -2.6 | [5] |
| 22 |  | DOA  | -5.2 | [6] |

23

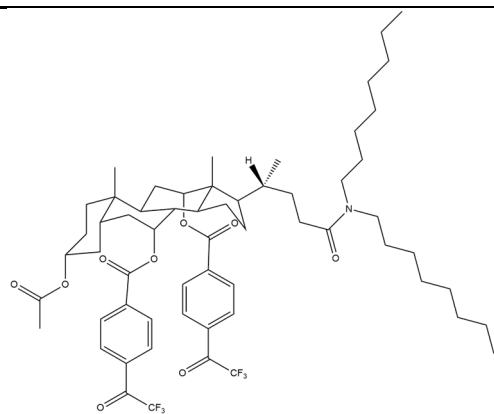

DOA

-4.7

[6]

24

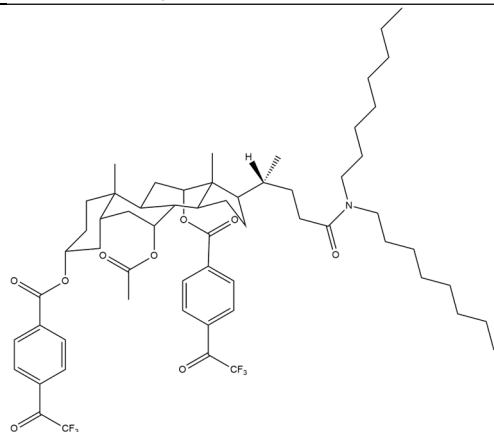

DOA

-5.7

[6]

25

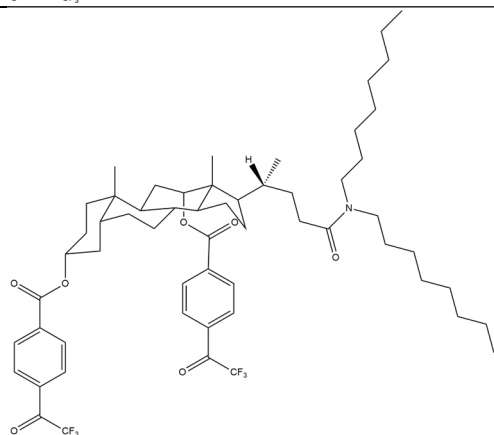

DOA

-3.1

[6]

26

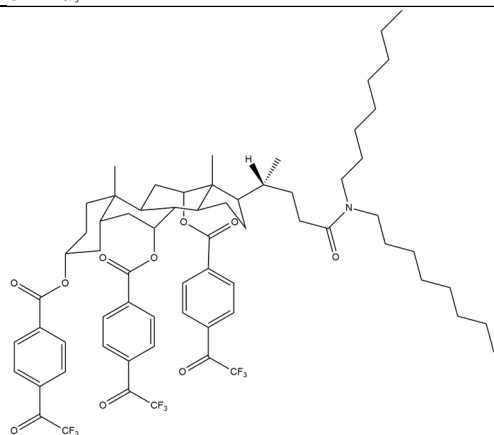

DOA

-5.8

[6]

27

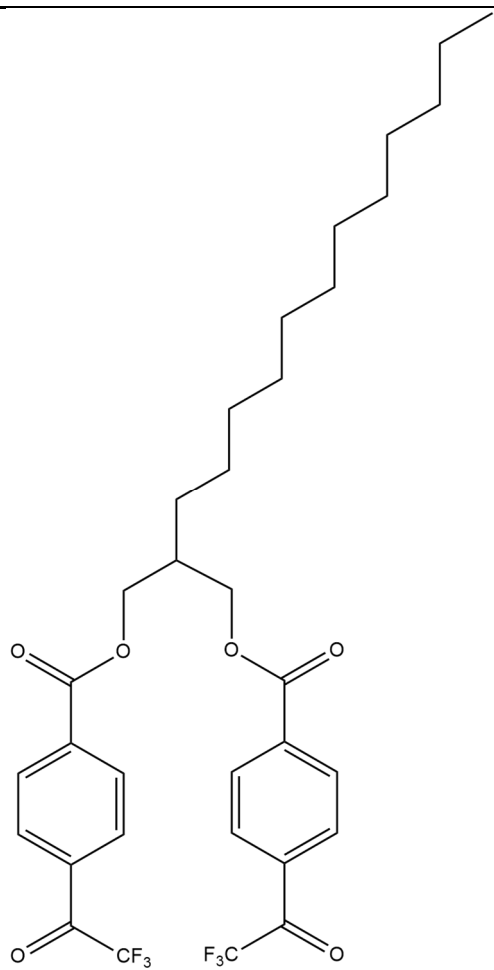

DOA

-4.2

[4]

28

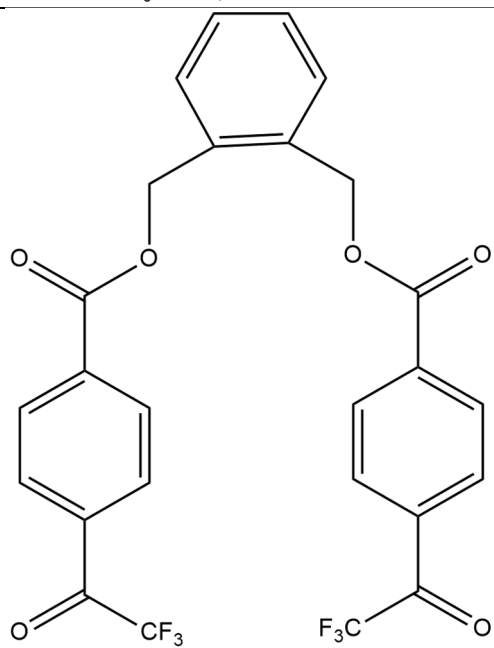

DOA

-2.6

[4]

|    |                                                                                    |      |     |     |
|----|------------------------------------------------------------------------------------|------|-----|-----|
| 29 | 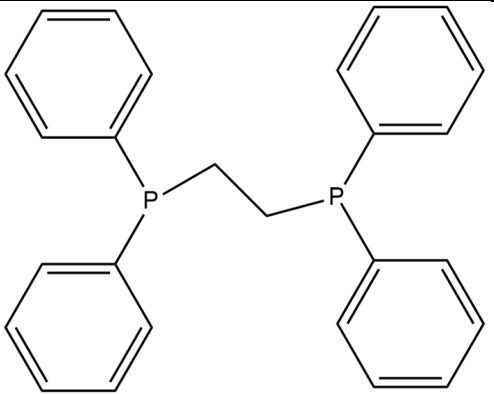  | NPOE | 1.7 | [7] |
| 30 |   | NPOE | 1.6 | [7] |
| 31 |  | DOS  | 5.5 | [8] |

32

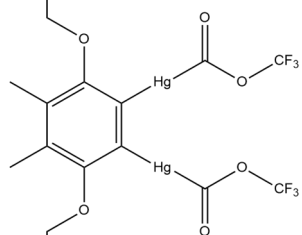

DOS

4.9

[8]

33

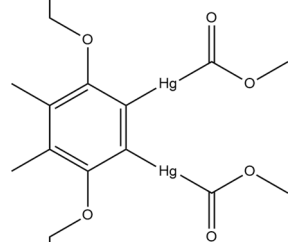

DOS

6.2

[8]

34

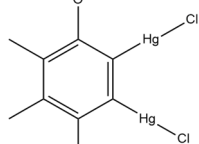

DOS

4.8

[8]

35

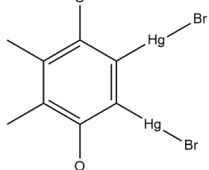

DOS

2.8

[8]

36

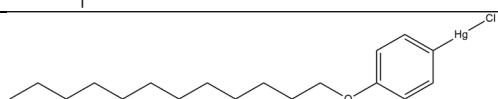

DOS

1.4

[8]



|    |                                                                                     |      |     |     |
|----|-------------------------------------------------------------------------------------|------|-----|-----|
| 37 | 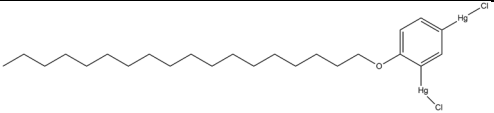   | DOS  | 4.5 | [8] |
| 38 |   | DOS  | 0.2 | [8] |
| 39 |  | NPOE | 2.9 | [8] |

|    |                                                                                    |      |     |     |
|----|------------------------------------------------------------------------------------|------|-----|-----|
| 40 | 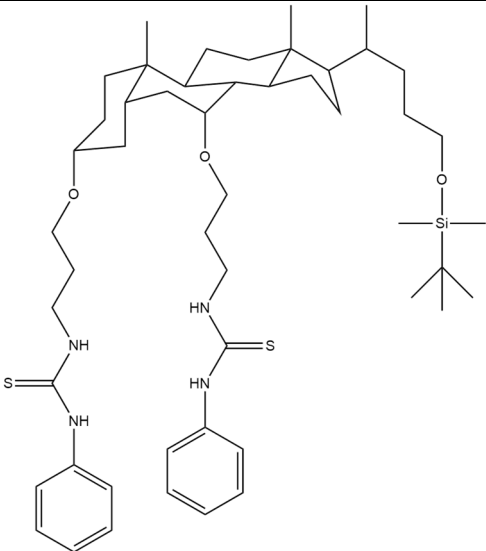  | NPOE | 1.1 | [6] |
| 41 |  | NPOE | 1.3 | [6] |

## References

1. Sokalski, T.; Paradowski, D.; Hulanicki, A. et al. Observations on the behaviour of some trifluoroacetophenone derivatives as neutral carriers for carbonate ion-selective electrodes. *Analyst*, **1996**, 121(2), 133–138. Doi:10.1039/an9962100133
2. Behringer, C.; Lehmann, B.; Simon, W. et al. Anion selectivities of trifluoroacetophenone derivatives as neutral ionophores in solvent-polymeric membranes. *Anal. Chim. Acta*. **1990**, 233, 41–47. Doi: 10.1016/S0003-2670(00)83459-5
3. Maj-Zurawska, M.; Sokalski, T.; Hulanicki, A. et al. Carbonate ion selective electrodes with trifluoroacetophenone derivatives in potentiometric clinical analyser. *Talanta*, **1997**, 44(9), 1641–1647. Doi:10.1016/s0039-9140(97)00069-6
4. Hong, Y. K.; Yoon, W. J.; Nam, H. et al. Effect of varying quaternary ammonium salt concentration on the potentiometric properties of some trifluoroacetophenone derivative-based solvent-polymeric membranes. *Electroanalysis*, **1997**, 9(11), 865–868. Doi: 10.1002/elan.1140091112
5. Makarychev-Mikhailov, S.; Goryacheva, O.; Vlasov, Y. et al. Carbonate Sensors Based on 4-Hexyltrifluoroacetophenone Modified by Acceptor Substituents in Phenyl Ring. *Electroanalysis*, **2003**, 15(1516), 1291–1296. 10.1002/elan.200302810
6. Shim, J.; Jeong, I.; Nam, H. et al. Ion-selective electrodes based on molecular tweezer-type neutral carriers. *Talanta*. **2004**, 63(1), 61–71. Doi:10.1016/j.talanta.2003.12.050
7. Kamata, S.; Nomura, S.; Ohashi, K. Anion-selective membrane electrode based on bis(diphenylphosphino)alkane-copper(II) complexes. *Bunseki Kagaku*. **1990**, 39, 677–681. Doi: 10.2116/bunsekikagaku.39.11\_677
8. Rothmaier, M.; Schaller, U.; Werner, E.; Pretsch, E. et al. Response mechanism of anion-selective electrodes based on mercury organic compounds as ionophores. *Anal. Chim. Acta*. **1996**, 327, 17–28. Doi: 10.1016/0003-2670(96)00055-4
